# Supplementary material
Source: Research Square preprint supplement (doi:10.21203/rs.3.rs-9126411/v1)
Supplement: Supplementary file 1 [file 5ba4acc7301702193a30d570.docx]

| **Supplement Table 1: Flow cytometry antibodies** | | |  |
| --- | --- | --- | --- |
| **Antibody** | **Company** | **Order number** | **Clone** |
| Alexa Fluor® 700 anti-human CD3 | Biolegend | 344822 | SK7 |
| 7-AAD | BD Pharmingen™ | 559925 | / |
| Brilliant Violet 421™ anti-human CD279 (PD-1) | Biolegend | 367422 | NAT105 |
| APC anti-human CD366 (Tim-3) | Biolegend | 364804 | A18087E |
| FITC anti-human CD223 (LAG-3) | Biolegend | 369307 | 11C3C65 |
| FITC anti-human CD45RA | Biolegend | 304106 | HI100 |
| APC anti-human CD197 (CCR7) | Biolegend | 353214 | G043H7 |
| Brilliant Violet 421™ anti-human CD183 (CXCR3) | Biolegend | 353715 | G025H7 |
| Brilliant Violet 421™ anti-human CD137 (4-1BB) | Biolegend | 309819 | 4B4-1 |
| APC anti-human CD69 | Biolegend | 310910 | FN50 |
| FITC Mouse IgG2b, κ Isotype Ctrl | Biolegend | 400309 | MPC-11 |
| APC Mouse IgG2a, κ Isotype Ctrl | Biolegend | 400221 | MOPC-173 |
| FITC Mouse IgG1, κ Isotype Ctrl | Biolegend | 400109 | MOPC-21 |
| Brilliant Violet 421™ Mouse IgG1, κ Isotype Ctrl | Biolegend | 400157 | MOPC-21 |
| APC Mouse IgG1, κ Isotype Ctrl | Biolegend | 400121 | MOPC-21 |
