# Supplementary material
Source: Research Square preprint supplement (doi:10.21203/rs.3.rs-9126411/v1)
Supplement: Supplementary file 2 [file 7d96db2d8886d7720f7b0b75.docx]

| Supplementary Table 2: Detailed statistical results for log10-transformed organ-level NIR-II exposure [log10(I)] in *ex vivo* organs on day 1. | | | | | | | | | |
| --- | --- | --- | --- | --- | --- | --- | --- | --- | --- |
| Day 1 | Organ | Group | Shapiro-Wilk (p value) | Levene's test (p value) | ANOVA (p value) | Tukey HSD | Adjusted p value | 95% CI | |
| Lower Bound | Upper Bound |
| brain | TX103 i.v. | 0.958 | 0.154 | <0.001 | vs. TX103 ICV | <0.001 | -1.251 | -0.946 |
| untargeted-T cells ICV | 0.416 | vs. TX103 i.v. | <0.001 | 0.915 | 1.221 |
| TX103 ICV | 0.794 | vs. untargeted-T cells ICV | 0.818 | -0.122 | 0.183 |
| Heart | TX103 i.v. | 0.823 | 0.87 | 0.135 | vs. TX103 ICV | 0.515 | -0.481 | 0.217 |
| untargeted-T cells ICV | 0.916 | vs. TX103 i.v. | 0.118 | -0.620 | 0.078 |
| TX103 ICV | 0.807 | vs. untargeted-T cells ICV | 0.483 | -0.209 | 0.488 |
| Spleen | TX103 i.v. | 0.622 | 0.077 | 0.878 | vs. TX103 ICV | 0.939 | -0.654 | 0.523 |
| untargeted-T cells ICV | 0.796 | vs. TX103 i.v. | 0.985 | -0.620 | 0.557 |
| TX103 ICV | 0.253 | vs. untargeted-T cells ICV | 0.872 | -0.492 | 0.685 |
| Kidney | TX103 i.v. | 0.958 | 0.912 | <0.001 | vs. TX103 ICV | <0.001 | 0.225 | 0.491 |
| untargeted-T cells ICV | 0.953 | vs. TX103 i.v. | <0.001 | -0.522 | -0.256 |
| TX103 ICV | 0.356 | vs. untargeted-T cells ICV | 0.765 | -0.102 | 0.164 |
|  |  | Shapiro-Wilk (p value) | Levene's test (p value) | Kruskal-Wallis | Dunn's post hoc test |  |  |  |
| Liver | TX103 i.v. | 0.919 | 0.04 | 0.066 | vs. TX103 ICV |  |  |  |
| untargeted-T cells ICV | 0.666 | vs. TX103 i.v. |  |  |  |
| TX103 ICV | 0.029 | vs. untargeted-T cells ICV |  |  |  |
| Lung | TX103 i.v. | 0.480 | 0.028 | 0.063 | vs. TX103 ICV |  |  |  |
| untargeted-T cells ICV | 0.782 | vs. TX103 i.v. |  |  |  |
| TX103 ICV | 0.538 | vs. untargeted-T cells ICV |  |  |  |
| Abbreviations: CI, confidence interval. | | | | | | | | | |

| Supplement Table 2: Detailed statistical results for log10-transformed organ-level NIR-II exposure [log10(I)] in *ex vivo* organs on day 4. | | | | | | | | | |
| --- | --- | --- | --- | --- | --- | --- | --- | --- | --- |
| Day 4 | Organ | Group | Shapiro-Wilk (p value) | Levene's test (p value) | ANOVA (p value) | Tukey HSD | Adjusted p value | 95% CI | |
| Lower Bound | Upper Bound |
| brain | TX103 i.v. | 0.792 | 0.057 | <0.001 | vs. TX103 ICV | <0.001 | -1.139 | -0.570 |
| untargeted-T cells ICV | 0.342 | vs. TX103 i.v. | <0.001 | 0.474 | 1.044 |
| TX103 ICV | 0.103 | vs. untargeted-T cells ICV | 0.587 | -0.189 | 0.380 |
| Heart | TX103 i.v. | 0.343 | 0.337 | 0.235 | vs. TX103 ICV | 0.506 | -0.110 | 0.247 |
| untargeted-T cells ICV | 0.759 | vs. TX103 i.v. | 0.215 | -0.289 | 0.067 |
| TX103 ICV | 0.428 | vs. untargeted-T cells ICV | 0.754 | -0.136 | 0.221 |
| Liver | TX103 i.v. | 0.396 | 0.548 | <0.001 | vs. TX103 ICV | <0.001 | 0.189 | 0.359 |
| untargeted-T cells ICV | 0.585 | vs. TX103 i.v. | 0.001 | -0.273 | -0.103 |
| TX103 ICV | 0.082 | vs. untargeted-T cells ICV | 0.056 | -0.170 | 0.013 |
| Lung | TX103 i.v. | 0.594 | 0.051 | 0.003 | vs. TX103 ICV | 0.004 | -0.321 | -0.091 |
| untargeted-T cells ICV | 0.952 | vs. TX103 i.v. | 0.005 | 0.079 | 0.309 |
| TX103 ICV | 0.129 | vs. untargeted-T cells ICV | 0.946 | -0.103 | 0.127 |
| Kidney | TX103 i.v. | 0.839 | 0.326 | <0.001 | vs. TX103 ICV | <0.001 | 0.514 | 0.590 |
| untargeted-T cells ICV | 0.558 | vs. TX103 i.v. | <0.001 | -0.517 | -0.441 |
| TX103 ICV | 0.701 | vs. untargeted-T cells ICV | 0.164 | -0.111 | 0.035 |
|  |  | Shapiro-Wilk (p value) | Levene's test (p value) | Kruskal-Wallis | Dunn's post hoc test |  |  |  |
| Spleen | TX103 i.v. | 0.472 | 0.014 | 0.252 | vs. TX103 ICV |  |  |  |
| untargeted-T cells ICV | 0.533 | vs. TX103 i.v. |  |  |  |
| TX103 ICV | 0.009 | vs. untargeted-T cells ICV |  |  |  |
| Abbreviations: CI, confidence interval. | | | | | | | | | |

| Supplement Table 2: Detailed statistical results for log10-transformed organ-level NIR-II exposure [log10(I)] in *ex vivo* organs on day 7. | | | | | | | | | |
| --- | --- | --- | --- | --- | --- | --- | --- | --- | --- |
| Day 7 | Organ | Group | Shapiro-Wilk (p value) | Levene's test (p value) | ANOVA (p value) | Tukey HSD | Adjusted p value | 95% CI | |
| Lower Bound | Upper Bound |
| brain | TX103 i.v. | 0.186 | 0.8 | <0.001 | vs. TX103 ICV | <0.001 | -0.897 | -0.530 |
| untargeted-T cells ICV | 0.954 | vs. TX103 i.v. | 0.206 | -0.067 | 0.300 |
| TX103 ICV | 0.486 | vs. untargeted-T cells ICV | <0.001 | 0.413 | 0.781 |
| Heart | TX103 i.v. | 0.868 | 0.183 | 0.37 | vs. TX103 ICV | 0.631 | -0.431 | 0.227 |
| untargeted-T cells ICV | 0.572 | vs. TX103 i.v. | 0.347 | -0.166 | 0.492 |
| TX103 ICV | 0.940 | vs. untargeted-T cells ICV | 0.841 | -0.390 | 0.268 |
| Liver | TX103 i.v. | 0.368 | 0.414 | 0.003 | vs. TX103 ICV | 0.006 | 0.079 | 0.336 |
| untargeted-T cells ICV | 0.937 | vs. TX103 i.v. | 0.005 | -0.349 | -0.092 |
| TX103 ICV | 0.986 | vs. untargeted-T cells ICV | 0.949 | -0.115 | 0.141 |
| Spleen | TX103 i.v. | 0.369 | 0.303 | 0.951 | vs. TX103 ICV | 0.950 | -0.169 | 0.206 |
| untargeted-T cells ICV | 0.889 | vs. TX103 i.v. | 0.972 | -0.202 | 0.174 |
| TX103 ICV | 0.918 | vs. untargeted-T cells ICV | 0.996 | -0.193 | 0.183 |
| Lung | TX103 i.v. | 0.879 | 0.879 | 0.001 | vs. TX103 ICV | 0.001 | -0.298 | -0.118 |
| untargeted-T cells ICV | 0.992 | vs. TX103 i.v. | 0.005 | 0.061 | 0.241 |
| TX103 ICV | 0.065 | vs. untargeted-T cells ICV | 0.205 | -0.033 | 0.147 |
| Kidney | TX103 i.v. | 0.886 | 0.208 | <0.001 | vs. TX103 ICV | <0.001 | 0.370 | 0.579 |
| untargeted-T cells ICV | 0.680 | vs. TX103 i.v. | <0.001 | -0.561 | -0.351 |
| TX103 ICV | <0.001 | vs. untargeted-T cells ICV | 0.855 | -0.123 | 0.086 |
| Abbreviations: CI, confidence interval. | | | | | | | | | |
