# Supplementary material
Source: Research Square preprint supplement (doi:10.21203/rs.3.rs-9126411/v1)
Supplement: Supplementary file 3 [file e58b287c7dfa6507ac259250.docx]

**Supplement Figure 1:**

(A) Viability of TX103 co-incubated with different concentrations of heparin–protamine complex (HPC) at different time points, assessed by trypan blue staining.
(B–D) Representative images of TX103 viability measured by an automated cell counter after trypan blue staining. Percentages indicate the proportion of viable cells: (B) unlabeled TX103; (C) TX103 co-incubated with 50 μg/mL ICG-NP and 1× HPC for 24 h; (D) TX103 co-incubated with 100 μg/mL ICG-NP and 1× HPC for 20 h.
(E, F) Prussian blue staining of labeled CAR-T cells showing a greater number of labeled cells under 100 μg/mL ICG-NP with 1× HPC for 20 h than under 50 μg/mL ICG-NP with 1× HPC for 24 h.
(G) Flow cytometry gating strategy used to identify live CAR-T cells and evaluate marker expression. Sequential gating included forward scatter/side scatter (FSC-A vs SSC-A) to exclude debris, FSC-A vs FSC-H to select singlets, live/dead discrimination, CD3⁺ T-cell identification, and subsequent analysis of exhaustion markers (TIM-3, PD-1) and nanoparticle probe uptake.

**Supplement Figure 2:**

(A) Quantification of CAR⁺ TX103 cells.
(B) Quantification of subset frequencies defined by CCR7/CD45RA expression, including TCM, naïve/TSCM, TEMRA, and TEM subsets.
(C) Quantification of CD69⁺ and 4-1BB⁺ TX103 cells across groups.
(D) Quantification of exhaustion marker expression, including LAG-3, PD-1, and TIM-3.
(E) Quantification of CXCR3⁺ TX103 cells.
Each condition was tested in three technical replicates. Statistical comparisons were performed using one-way ANOVA with Tukey’s post hoc test or Kruskal–Wallis test with Bonferroni-corrected Dunn’s post hoc test, as appropriate.

**Supplement Figure 3:** (A) NIR-II imaging of unlabeled TX103 across graded cell numbers. As a negative control, unlabeled TX103 at increasing cell numbers (600–2 × 10⁶) showed no detectable fluorescence signal, supporting probe specificity.

**Supplement Figure 4:**

(A) Bioluminescence imaging confirming successful tumor engraftment in all mice (n = 27) on day 7 post-inoculation. The color scale represents photon counts.

(B) Western blot analysis of B7-H3 expression in U87MG and additional glioma cell lines; GAPDH served as the loading control.

(C) Representative whole-body NIR-II images of glioma-bearing mice at baseline (day 9).

(D) Representative NIR-II image of a mouse treated with labeled TX103 via intracerebroventricular (ICV) administration. Symmetric signals on both sides of the neck (yellow arrows) were observed, consistent with deep cervical lymph node regions.

(E) Ex vivo NIR-II imaging of major organs (heart, lung, intestine) collected on days 1, 4, and 7 after treatment in mice receiving untargeted T cells, ICV-TX103, or i.v.-TX103.

(F) Quantification of log10-transformed organ-level NIR-II exposure [log10(I)] in different organs (brain, heart, liver, spleen, lung, kidney) at days 1, 4, and 7 after treatment. Data were analyzed using one-way ANOVA with Tukey’s post hoc test when assumptions were met, or Kruskal–Wallis test with Bonferroni-corrected Dunn’s post hoc test otherwise. Detailed statistical results are provided in Supplementary Table 2.

**Supplement Figure 5:** (A) Hematoxylin and eosin (H&E) staining of organ specimens obtained from orthotopic U87MG glioma-bearing mice on day 7 after treatment. Intracranial tumor regions are outlined with a green line.
